# Supplementary material for: Bioaccumulation and Phytotoxicity and Human Health Risk from Microcystin-LR under Various Treatments: A Pot Study
Source: MDPI journal article supplement (doi:10.3390/toxins12080523), 2020-08-14
Supplement: s1 [file s1]

# Supplementary Materials: Bioaccumulation and Phytotoxicity and Human Health Risk from Microcystin-LR under Various Treatments: A Pot Study

Lei Xiang, Yan-Wen Li, Zhen-Ru Wang, Bai-Lin Liu, Hai-Ming Zhao, Hui Li, Quan-Ying Cai, Ce-Hui Mo and Qing X. Li

**Table S1.** Pearson's correlation coefficients among MC-LR concentration, MDA contents and biomass of *Ipomoea batatas* L. ( $n = 12$ ).

|    | RC <sup>a</sup> | SC                   | LC    | RM    | SM                  | LM                  | MR                   | PH                   | TW                  | AW     |
|----|-----------------|----------------------|-------|-------|---------------------|---------------------|----------------------|----------------------|---------------------|--------|
| RC | -               | 0.548 <sup>*,b</sup> | 0.161 | 0.118 | 0.476               | 0.700 <sup>*</sup>  | -0.566 <sup>*</sup>  | -0.803 <sup>**</sup> | -0.147              | -0.098 |
| SC | -               | -                    | 0.367 | 0.104 | 0.858 <sup>**</sup> | 0.833 <sup>**</sup> | -0.889 <sup>**</sup> | -0.672 <sup>*</sup>  | -0.538 <sup>*</sup> | -0.501 |
| LC | -               | -                    | -     | 0.421 | 0.457               | 0.617 <sup>*</sup>  | -0.305               | 0.058                | 0.231               | 0.175  |
| RM | -               | -                    | -     | -     | 0.478               | 0.276               | -0.106               | -0.125               | 0.441               | 0.401  |
| SM | -               | -                    | -     | -     | -                   | 0.787 <sup>**</sup> | -0.888 <sup>**</sup> | -0.563               | -0.306              | -0.343 |
| LM | -               | -                    | -     | -     | -                   | -                   | -0.767 <sup>**</sup> | -0.584 <sup>*</sup>  | -0.265              | -0.266 |

<sup>a</sup> RC, SC, LC indicate MC-LR concentration in root, stem, and leaf, respectively; RM, SM, and LM indicate MDA contents in root, and stem, and leaf, respectively; MR, PH, TW, and AW indicate main root length, plant height, total weight, and aerial part weight, respectively. <sup>b</sup> “\*” and “\*\*” indicate  $p < 0.05$  and  $p < 0.01$ , respectively.

**Table S2.** Pearson's correlation coefficients among MC-LR concentration, MDA contents and biomass of *Brassica juncea* L. ( $n = 12$ ).

|    | RC <sup>a</sup> | SC                    | LC                 | RM                  | SM    | LM                  | MR     | PH                   | TW                  | AW                   |
|----|-----------------|-----------------------|--------------------|---------------------|-------|---------------------|--------|----------------------|---------------------|----------------------|
| RC | -               | 0.829 <sup>**,b</sup> | 0.558 <sup>*</sup> | -0.661 <sup>*</sup> | 0.054 | 0.519 <sup>*</sup>  | -0.520 | -0.645 <sup>**</sup> | -0.663 <sup>*</sup> | -0.768 <sup>**</sup> |
| SC | -               | -                     | 0.284              | -0.310              | 0.078 | 0.396 <sup>**</sup> | -0.342 | -0.381               | -0.316              | -0.648 <sup>*</sup>  |
| LC | -               | -                     | -                  | -0.311              | 0.134 | 0.413               | -0.297 | 0.517                | -0.672 <sup>*</sup> | 0.539 <sup>*</sup>   |
| RM | -               | -                     | -                  | -                   | 0.199 | -0.175              | -0.048 | 0.270                | 0.476               | 0.463                |
| SM | -               | -                     | -                  | -                   | -     | -0.559              | 0.032  | 0.014                | 0.120               | -0.389               |
| LM | -               | -                     | -                  | -                   | -     | -                   | -0.519 | -0.687 <sup>*</sup>  | -0.653 <sup>*</sup> | -0.343               |

<sup>a</sup> RC, SC, LC indicate MC-LR concentration in root, stem, and leaf, respectively; RM, SM, and LM indicate MDA contents in root, and stem, and leaf, respectively; MR, PH, TW, and AW indicate main root length, plant height, total weight, and aerial part weight, respectively. <sup>b</sup> “\*” and “\*\*” indicate  $p < 0.05$  and  $p < 0.01$ , respectively.

**Table S3.** Pearson's correlation coefficients among MC-LR concentration, MDA contents and biomass of *Brassica alboglabra* L. ( $n = 12$ ).

|    | RC <sup>a</sup> | SC                    | LC    | RM      | SM      | LM       | MR        | PH     | TW        | AW       |
|----|-----------------|-----------------------|-------|---------|---------|----------|-----------|--------|-----------|----------|
| RC | -               | 0.960 ** <sup>b</sup> | 0.435 | 0.608 * | 0.685 * | 0.847 ** | -0.961 ** | -0.347 | -0.764 ** | -0.674 * |
| SC | -               | -                     | 0.426 | 0.583 * | 0.559 * | 0.746 *  | -0.917 ** | -0.401 | -0.692 *  | -0.600 * |
| LC | -               | -                     | -     | 0.007   | 0.437   | 0.574 *  | -0.240    | -0.392 | 0.187     | 0.285    |
| RM | -               | -                     | -     | -       | -0.029  | 0.554 *  | -0.594 *  | -0.269 | -0.571 *  | -0.578 * |
| SM | -               | -                     | -     | -       | -       | 0.658 *  | -0.703 *  | -0.058 | -0.550    | -0.412   |
| LM | -               | -                     | -     | -       | -       | -        | -0.790 ** | -0.303 | -0.555 *  | -0.440   |

<sup>a</sup> RC, SC, LC indicate MC-LR concentration in root, stem, and leaf, respectively; RM, SM, and LM indicate MDA contents in root, and stem, and leaf, respectively; MR, PH, TW, and AW indicate main root length, plant height, total weight, and aerial part weight, respectively. <sup>b</sup> “\*” and “\*\*” indicate  $p < 0.05$  and  $p < 0.01$ , respectively.

**Table S4.** Water contents (%) of the tested vegetables.

| Vegetable                     | Root        | Stem       | Leaf       |
|-------------------------------|-------------|------------|------------|
| <i>Ipomoea batatas</i> L.     | 89.5 ± 4.7  | 88.7 ± 2.3 | 88.3 ± 0.9 |
| <i>Brassica juncea</i> L.     | 86.5 ± 2.1  | 95.0 ± 2.1 | 93.6 ± 1.1 |
| <i>Brassica alboglabra</i> L. | 70.9 ± 25.2 | 92.2 ± 2.5 | 89.5 ± 1.2 |

**Table S5.** Spiked recoveries (%;  $n = 4$ ) of MC-LR at 5 ng/g in the tested vegetables and corresponding soil.

| Vegetable                     | Root            |     | Stem |     | Leaf |     | Soil |     |
|-------------------------------|-----------------|-----|------|-----|------|-----|------|-----|
|                               | Re <sup>a</sup> | RSD | Re   | RSD | Re   | RSD | Re   | RSD |
| <i>Ipomoea batatas</i> L.     | 107.2           | 3.4 | 87.3 | 7.8 | 61.3 | 5.5 | 72.6 | 8.9 |
| <i>Brassica juncea</i> L.     | 92.2            | 6.1 | 80.5 | 4.7 | 65.6 | 3.8 | 80.5 | 2.5 |
| <i>Brassica alboglabra</i> L. | 88.5            | 8.8 | 79.5 | 6.5 | 75.5 | 7.8 | 97.4 | 9.5 |

<sup>a</sup> “RE” and “RSD” indicate recovery and relative standard deviation, respectively.
